# Supplementary material
Source: Research Square preprint supplement (doi:10.21203/rs.3.rs-9414636/v1)
Supplement: Supplementary file 1 [file 3172b2301ead29df3e6b2ca8.docx]

**Supplementary materials:**

**Figure S1**. 1H NMR spectrum of lovastatin in C3D6O at 300 K, * - solvent signals.





**Figure S2.** 13C NMR spectrum of lovastatin in C3D6O at 300 K, * - solvent signals.


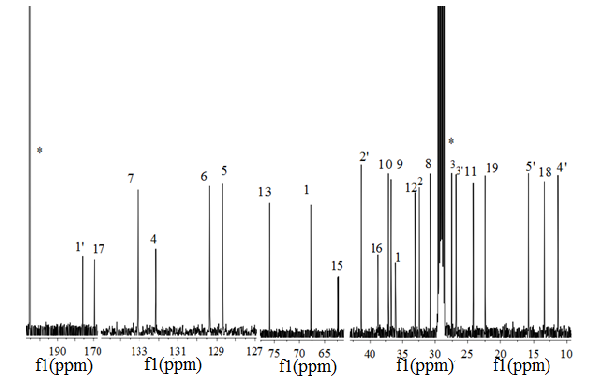


**Figure S3** –Radial distribution function (RDF) functions for lovastatin CH-15 and CH2-16 H atoms and Zn2+ (red), Mn2+ (orange), and Ni2+ (blue) ions obtained from the simulation results.


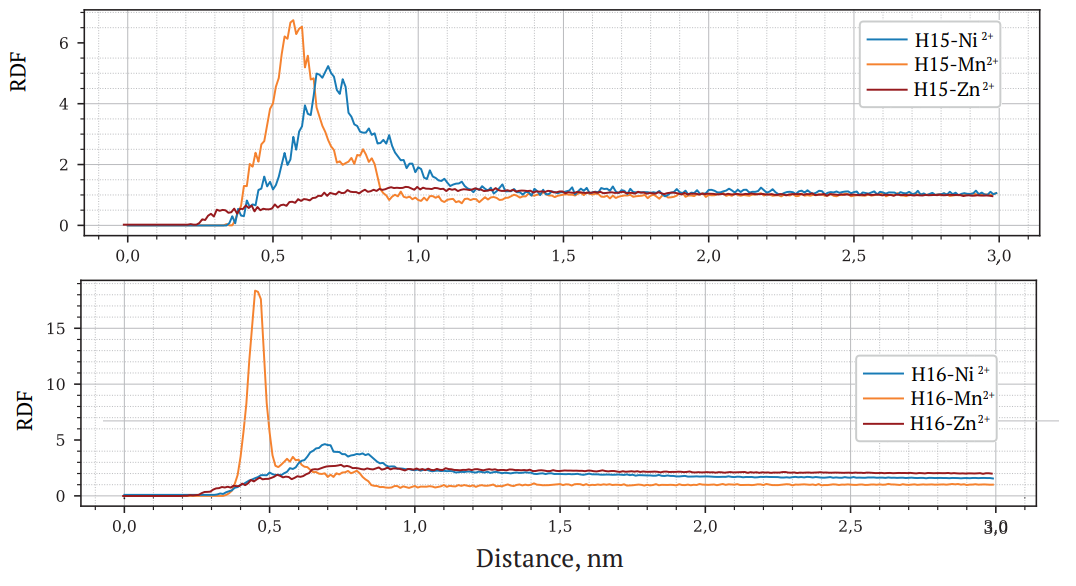


**Table S1.** Chemical shifts in the 1H, 13C NMR spectrum of lovastatin in C3D6O at 300 K

| Chemical group | δ 1H, ppm | δ 13C, ppm |
| --- | --- | --- |
| CH-1 | 5.36 | 67.68 |
| CH2-2 | 1.96 | 32.44 |
| CH-3 | 2.43 | 27.60 |
| CH-4 | 5.53 | 132.16 |
| C-5 | - | 128.64 |
| CH-6 | 6.00 | 129.37 |
| CH-7 | 5.81 | 133.09 |
| CH-8 | 2.42 | 30.75 |
| CH-9 | 1.73 | 36.76 |
| CH-10 | 2.36 | 37.18 |
| CH2-11 | 1.53; 1.40 | 24.16 |
| CH2-12 | 1.82 | 33.11 |
| CH-13 | 4.62 | 77.30 |
| CH2-14 | 1.94; 1.75 | 36.08; 36.13 |
| CH-15 | 4.32 | 62.21 |
| CH2-16 | 2.66; 2.5 | 38.61; 38.66 |
| C-17 | - | 169.48 |
| CH3-18 | 0.9 | 13.36 |
| CH3-19 | 1.07 | 22.45 |
| C-1’ | - | 175.69 |
| CH-2’ | 2.35 | 41.31 |
| CH2-3’ | 1.67; 1.46 | 26.81 |
| CH3-4’ | 0.87 | 11.28 |
| CH3-5’ | 1.09 | 15.80 |

**Table S2**. Chemical shifts and changes in the chemical shifts in the 1H, 13C NMR spectrum of lovastatin with Mn2+ ions at statin:ion ratios 1:0 (**a**), 50:1 (**b**), 5:1 (**c**) in C3D6O at 300 K (the chemical shift change is highlighted).

| Number of atom | **a**: | | **b:** | **c:** | |
| --- | --- | --- | --- | --- | --- |
| δ 1H,  ppm | δ13C,  ppm | δ 1H,  ppm | δ 1H,  ppm | δ13C,  ppm |
| 1 | 5.36 | **67.68** | 5.36 | 5.36 | **64.12** |
| 2 | 1.96 | **32.44** | 1.96 | 1.96 | **28.28** |
| 3 | 2.43 | **27.60** | 2.43 | 2.43 | **23.41** |
| 4 | 5.53 | **132.16** | 5.53 | 5.53 | **127.92** |
| 5 | - | **128.64** | - | - | **124.44** |
| 6 | 6.00 | **129.37** | 6.00 | 6.00 | **125.38** |
| 7 | 5.81 | **133.09** | 5.81 | 5.81 | **129.13** |
| 8 | 2.42 | **30.75** | 2.42 | 2.42 | **26.60** |
| 9 | 1.73 | **36.76** | 1.73 | 1.73 | **32.67** |
| 10 | 2.36 | **37.18** | 2.36 | 2.36 | **33.01** |
| 11 | 1.53;1.40 | **24.16** | 1.53;1.40 | 1.53; 1.40 | **19.82** |
| 12 | 1.82 | **33.11** | 1.82 | 1.82 | **28.76** |
| 13 | **4.62** | **75.93** | **4.62** | **4.64** | **72.56** |
| 14 | 1.94(b);  1.75(a) | **36.13(b);**  **36.08(a)** | 1.94;  1.75 | 1.94;  1.75 | **31.46** |
| 15 | **4.32** | **62.21** | **4.32** | **4.31** | **-** |
| 16 | **2.66 (b);**  **2.50 (a)** | **38.61 (b);**  **38.66 (a)** | **2.67**  **2.51** | **2.70**  **2.55** | **34.20** |
| 17 | - | **169.48** | - | - | **-** |
| 18 | 0.90 | **13.36** | 0.90 | 0.90 | **9.29** |
| 19 | 1.07 | **22.45** | 1.07 | 1.07 | **18.38** |
| 1’ | - | **175.69** | - | - | **-** |
| 2’ | 2.35 | **41.31** | 2.35 | 2.35 | **37.45** |
| 3’ | 1.67;1.46 | **26.81** | 1.67;1.46 | 1.67;1.46 | **22.67** |
| 4’ | 0.87 | **11.28** | 0.87 | 0.87 | **7.24** |
| 5’ | 1.09 | **15.80** | 1.09 | 1.09 | **11.76** |

**Table S3**. Chemical shifts and changes in the chemical shifts in the 1H, 13C NMR spectrum of lovastatin with Ni2+ ions at statin:ion ratios 1:0 (**a**), 50:1 (**b**), 5:1 (**c**) in C3D6O at 300 K (the chemical shift change is highlighted).

| Number of atom | **a**: | | **b:** | **c:** | |
| --- | --- | --- | --- | --- | --- |
| δ 1H,  ppm | δ13C,  ppm | δ 1H,  ppm | δ 1H,  ppm | δ13C,  ppm |
| 1 | 5.36 | **67.68** | 5.36 | 5.36 | **65.05** |
| 2 | 1.96 | **32.44** | 1.96 | 1.96 | **29.36** |
| 3 | 2.43 | **27.60** | 2.43 | 2.43 | **24.48** |
| 4 | 5.53 | **132.16** | 5.53 | 5.53 | **129.00** |
| 5 | - | **128.64** | - | - | **125.51** |
| 6 | 6.00 | **129.37** | 6.00 | 6.00 | **126.40** |
| 7 | 5.81 | **133.09** | 5.81 | 5.81 | **130.19** |
| 8 | 2.42 | **30.75** | 2.42 | 2.42 | **27.67** |
| 9 | 1.73 | **36.76** | 1.73 | 1.73 | **33.72** |
| 10 | 2.36 | **37.18** | 2.36 | 2.36 | **34.08** |
| 11 | 1.53;1.40 | **24.16** | 1.53;1.40 | 1.53; 1.40 | **20.93** |
| 12 | 1.82 | **33.11** | 1.82 | 1.82 | **29.86** |
| 13 | **4.62** | **75.93** | **4.62** | **4.63** | **73.45** |
| 14 | 1.94(b);  1.75(a) | **36.13(b);**  **36.08(a)** | 1.94;  1.75 | 1.94;  1.75 | **32.63** |
| 15 | **4.32** | **62.21** | **4.31** | **4.31** | **58.92** |
| 16 | **2.66 (b);**  **2.50 (a)** | **38.61 (b);**  **38.66 (a)** | **2.67**  **2.51** | **2.70**  **2.54** | **35.33** |
| 17 | - | **169.48** | - | - | **-** |
| 18 | 0.90 | **13.36** | 0.90 | 0.90 | **10.35** |
| 19 | 1.07 | **22.45** | 1.07 | 1.07 | **19.46** |
| 1’ | - | **175.69** | - | - | **-** |
| 2’ | 2.35 | **41.31** | 2.35 | 2.35 | **38.43** |
| 3’ | 1.67;1.46 | **26.81** | 1.67;1.46 | 1.67;1.46 | **23.72** |
| 4’ | 0.87 | **11.28** | 0.87 | 0.87 | **8.27** |
| 5’ | 1.09 | **15.80** | 1.09 | 1.09 | **12.81** |

**Table S4.** Self-diffusion coefficients of lovastatin, water, and acetone at different ratios of statin: Zn2+, Mn2+, Ni2+ion at a temperature of 300 K.

| Statin:ion ratio | Dstatin, m2/s | DH2O, m2/s | DC3H6O, m2/s |
| --- | --- | --- | --- |
| pure statin | 1.28*10-9 | 4.5*10-9 | 3.8*10-9 |
| 50:1 Zn2+ | 1.28*10-9 | 4.5*10-9 | 3.8*10-9 |
| 5:1 Mn2+ | 1.6*10-10 | - | 1.80*10-9 |
| 5:1 Ni2+ | 5.4*10-10 | - | 1.8*10-9 |

**Table S5**. 1H-13C NOESY distances (r) and cross-relaxation rates (σ) for lovastatin in C3D6O at 300 K in the absence and presence of metal ions (Mn2+, Ni2+) determined from 2D NOESY NMR experiments. The distance between nonequivalent protons of the CH2-11 group (*11a-11b, 2.49 Å) was used as an internal reference for distance calibration.

| **Statin:ion ratio** | **Group of atoms** | **r, Å** | **σ, 1/s** |
| --- | --- | --- | --- |
| **Pure statin** | 3-4 | 3,58 | 0,019 |
|  | 3-18 | 3,31 | 0,031 |
|  | 9-15 | 3,24 | 0,035 |
|  | *11a-11b | 2,49 | 0,017 |
| **5:1 Mn2+** | 3-4 | 3,72 | 0,031 |
|  | 3-18 | 3,65 | 0,035 |
|  | 9-15 | 4,19 | 0,025 |
|  | *11a-11b | 2,49 | 0,018 |
| **5:1 Ni2+** | 3-4 | 2,86 | 0,035 |
|  | 3-18 | 3,01 | 0,026 |
|  | 9-15 | 3,13 | 0,020 |
|  | *11a-11b | 2,49 | 0,079 |
